# Supplementary material for: GINA Implementation Improves Asthma Symptoms Control and Lung Function: A Five-Year Real-World Follow-Up Study
Source: MDPI journal article supplement (doi:10.3390/jpm13050809), 2023-05-10
Supplement: s1 [file s1]

## SUPPLEMENTARY

# GINA implementation Improves Asthma Symptoms Control and Lung Function: A Five-Year Real-World Follow-Up Study

Nguyen Van Tho <sup>1,2</sup>, Vu Tran Thien Quan <sup>2,3</sup>, Do Van Dung <sup>4</sup>, Nguyen Hoang Phu <sup>5</sup>, Anh Tuan Dinh-Xuan <sup>6</sup>, Le Thi Tuyet Lan <sup>2,\*</sup>

1 Department of Tuberculosis and Lung Diseases, Faculty of Medicine, University of Medicine and Pharmacy at Ho Chi Minh City

2 Department of Pulmonary Functional Exploration, University Medical Center, University of Medicine and Pharmacy at Ho Chi Minh City, Vietnam

3 Department of Physiology, Faculty of Medicine, University of Medicine and Pharmacy at Ho Chi Minh City

4 Department of Biostatistics, Faculty of Public Health, University of Medicine and Pharmacy at Ho Chi Minh City

5 Department of Pulmonology, Dong Nai General Hospital, Bien Hoa City, Vietnam

6 AP-HP, Hôpital Cochin, Service de Physiologie-Explorations Fonctionnelles, Paris, France

\* Correspondence: tuyetlanyds@gmail.com; Tel.: +84-028 38594470

**Table S1.** Level of asthma control according to GINA 2006.

| Characteristic                         | Controlled<br>(All of the following) | Partly controlled<br>(Any present in any week)         | Uncontrolled                                                       |
|----------------------------------------|--------------------------------------|--------------------------------------------------------|--------------------------------------------------------------------|
| Daytime symptoms                       | Twice or less per week               | More than twice per week                               | 3 or more features of partly controlled asthma present in any week |
| Limitations of activities              | None                                 | Any                                                    |                                                                    |
| Nocturnal symptoms / awakening         | None                                 | Any                                                    |                                                                    |
| Need for rescue / "reliever" treatment | Twice or less per week               | More than twice per week                               |                                                                    |
| Lung function (PEF or FEV1)            | Normal                               | < 80% predicted or personal best (if known) on any day |                                                                    |

**Table S2.** Level of asthma control according to GINA 2016.

| Symptom control                                      |                                                          | Level of asthma symptom control |                   |              |
|------------------------------------------------------|----------------------------------------------------------|---------------------------------|-------------------|--------------|
| In the past 4 weeks, has the patient had:            |                                                          | Well-controlled                 | Partly controlled | Uncontrolled |
| Daytime asthma symptoms more than twice a week?      | Yes <input type="checkbox"/> No <input type="checkbox"/> | None of these                   | 1-2 of these      | 3-4 of these |
| Any night waking due to asthma?                      | Yes <input type="checkbox"/> No <input type="checkbox"/> |                                 |                   |              |
| Reliever needed for symptoms more than twice a week? | Yes <input type="checkbox"/> No <input type="checkbox"/> |                                 |                   |              |
| Any activity limitation due to asthma?               | Yes <input type="checkbox"/> No <input type="checkbox"/> |                                 |                   |              |

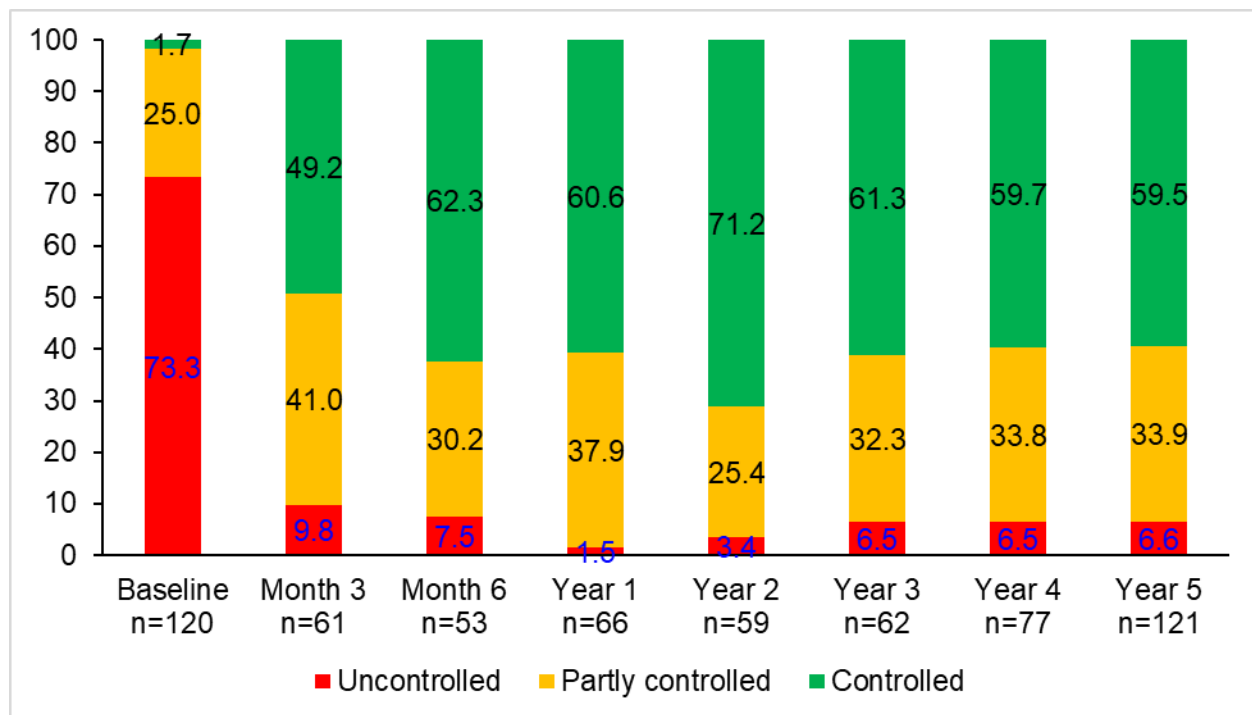

**Figure S1.** Proportions of different levels of asthma symptoms control during 5 years of asthma management among 121 patients who attended the follow-up visit at year 5.

**Table S3.** Relation between baseline characteristics and the proportion of well-controlled asthma at year 1.

| Baseline characteristics        |                     | Well- controlled asthma | P value |
|---------------------------------|---------------------|-------------------------|---------|
| Childhood asthma                | No (n=536)          | 343 (64.0%)             | 0.4515  |
|                                 | Yes (n=232)         | 155 (66.8%)             |         |
| Allergic rhinitis               | No (n=549)          | 360 (65.6%)             | 0.4563  |
|                                 | Yes (n=220)         | 138 (62.7%)             |         |
| GERD                            | No (n=670)          | 437 (65.2%)             | 0.4854  |
|                                 | Yes (n=99)          | 61 (61.6%)              |         |
| BMI $\geq$ 25 kg/m <sup>2</sup> | No (n=670)          | 438 (65.4%)             | 0.3574  |
|                                 | Yes (n=99)          | 60 (60.6%)              |         |
| Co-paid by health insurance     | No (n=561)          | 353 (62.9%)             | 0.1550  |
|                                 | Yes (n=197)         | 135 (68.5%)             |         |
| ICS molecule                    | Budesonide (n=224)  | 151 (67.4%)             | 0.3480  |
|                                 | Fluticasone (n=534) | 341 (63.9%)             |         |

Data are presented as n (%). GERD, gastroesophageal reflux; ICS, inhaled corticosteroid.

**Table S4.** Relation between baseline characteristics and the proportion of well-controlled asthma at year 5.

| Baseline characteristics        |                    | Well-controlled asthma | P value |
|---------------------------------|--------------------|------------------------|---------|
| Childhood asthma                | No (n=82)          | 49 (59.8%)             | 0.9348  |
|                                 | Yes (n=39)         | 23 (59.0%)             |         |
| Allergic rhinitis               | No (n=78)          | 46 (59.0%)             | 0.8729  |
|                                 | Yes (n=43)         | 26 (60.5%)             |         |
| GERD                            | No (n=101)         | 63 (62.4%)             | 0.1517  |
|                                 | Yes (n=20)         | 9 (45.0%)              |         |
| BMI $\geq$ 25 kg/m <sup>2</sup> | No (n=104)         | 65 (62.5%)             | 0.1002  |
|                                 | Yes (n=17)         | 7 (41.2%)              |         |
| Co-paid by health insurance     | No (n=92)          | 56 (60.9%)             | 0.4932  |
|                                 | Yes (n=28)         | 15 (53.6%)             |         |
| ICS molecule                    | Budesonide (n=40)  | 25 (62.5%)             | 0.7107  |
|                                 | Fluticasone (n=78) | 46 (59.0%)             |         |

Data are presented as n (%). GERD, gastroesophageal reflux; ICS, inhaled corticosteroid.

**Table S5.** Relation between baseline characteristics and proportion of patients who attended the follow-up visit at year 1.

| Baseline characteristics        |                          | Follow-up visit at year 1 | P value       | OR (95% CI)             |
|---------------------------------|--------------------------|---------------------------|---------------|-------------------------|
| Gender                          | Male (n=491)             | 274 (55.8%)               | 0.8240        | 1.03 (0.82-1.28)        |
|                                 | Female (n=897)           | 495 (55.2%)               |               |                         |
| Place of residence              | Other provinces (n=932)  | 537 (57.6%)               | <b>0.0178</b> | <b>1.31 (1.05-1.64)</b> |
|                                 | Ho Chi Minh City (n=456) | 232 (50.9%)               |               |                         |
| Childhood asthma                | Yes (n=408)              | 232 (56.9%)               | 0.4704        | 1.09 (0.86-1.38)        |
|                                 | No (n=979)               | 536 (54.8%)               |               |                         |
| Allergic rhinitis               | Yes (n=357)              | 220 (61.6%)               | <b>0.0059</b> | <b>1.41 (1.10-1.80)</b> |
|                                 | No (n=1031)              | 549 (53.3%)               |               |                         |
| GERD                            | Yes (n=178)              | 99 (55.6%)                | 0.9691        | 1.01 (0.73-1.38)        |
|                                 | No (n=1208)              | 670 (55.5%)               |               |                         |
| BMI $\geq$ 25 kg/m <sup>2</sup> | No (n=1182)              | 670 (56.7%)               | <b>0.0219</b> | <b>1.41 (1.05-1.90)</b> |
|                                 | Yes (n=206)              | 99 (48.1%)                |               |                         |
| Bronchodilator reversibility    | Yes (n=773)              | 441 (57.1%)               | 0.1856        | 1.16 (0.93-1.43)        |
|                                 | No (n=604)               | 323 (53.5%)               |               |                         |
| Co-paid by health insurance     | Yes (n=324)              | 197 (60.8%)               | <b>0.0462</b> | <b>1.29 (1.00-1.67)</b> |
|                                 | No (n=1029)              | 561 (54.5%)               |               |                         |
| ICS molecule                    | Fluticasone (n=919)      | 534 (58.1%)               | <b>0.0111</b> | <b>1.34 (1.07-1.69)</b> |
|                                 | Budesonide (n=441)       | 224 (50.8%)               |               |                         |
| High-dose ICS                   | Yes (n=1050)             | 606 (57.7%)               | 0.0558        | 1.30 (0.99-1.69)        |
|                                 | No (n=275)               | 141 (51.3%)               |               |                         |

GERD, gastroesophageal reflux; ICS, inhaled corticosteroid.

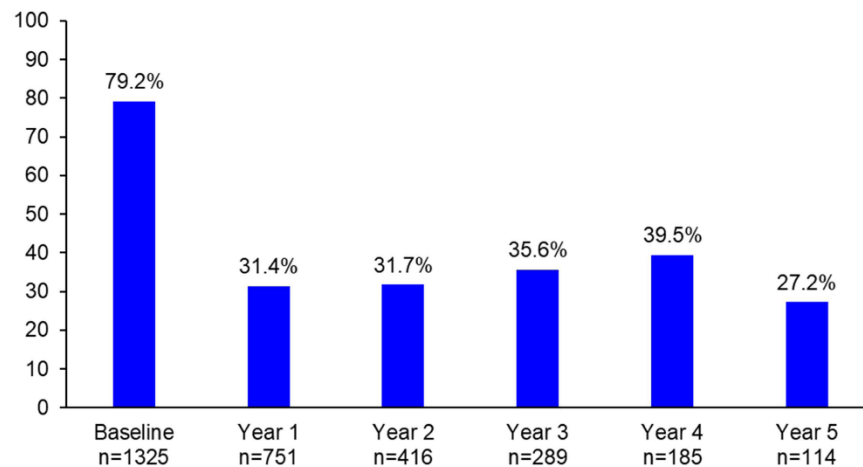

**Figure S2.** The proportion of patients with high-dose ICS decreased over 5 years of asthma management. High-dose ICS was defined as equivalent fluticasone propionate > 500 µg/day.
